# Supplementary material
Source: PubMed Central journal article supplement (PMC1308925)

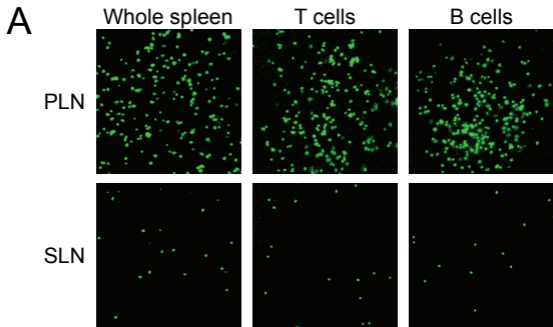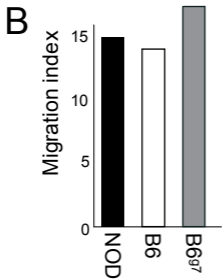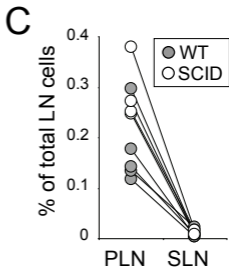

Supplement: pnas_0509006102_1.pdf [file pnas_0509006102_1.pdf]
